# Supplementary material
Source: MDPI journal article supplement (https://www.mdpi.com/2410-3888/8/1/51)
Supplement: s1 [file s1]

**Table S1.** Chemistry assay methods and analytical precision applicable to sea star coelomic fluid and tank water based on quality control data.

| Measurand                                                                                                                                                                                                                                                                   | Analyzer   | Assay Method                          | CV% |
|-----------------------------------------------------------------------------------------------------------------------------------------------------------------------------------------------------------------------------------------------------------------------------|------------|---------------------------------------|-----|
| Calcium                                                                                                                                                                                                                                                                     | Axcel      | Arenazo III dye binding               | 2.4 |
| Chloride                                                                                                                                                                                                                                                                    | Axcel      | ISE, indirect method, Nernst equation | 2.0 |
| Magnesium                                                                                                                                                                                                                                                                   | ChemWell T | Xylidyl blue                          | 2.3 |
| Potassium                                                                                                                                                                                                                                                                   | Axcel      | ISE, indirect method, Nernst equation | 2.3 |
| Sodium                                                                                                                                                                                                                                                                      | Axcel      | ISE, indirect method, Nernst equation | 2.0 |
| Axcel (Alfa Wasserman Diagnostic Technologies, LLC, West Caldwell, New Jersey, USA) control material, Level I. ChemWell T analyzer (Awareness Technology Inc., Palm City, Florida, USA) with CataTrol quality control, Level II (Catachem, Inc., Oxford, Connecticut, USA). |            |                                       |     |
